# Supplementary material for: Postoperative Complications Are Associated with Long-Term Changes in the Gut Microbiota Following Colorectal Cancer Surgery
Source: MDPI journal article supplement (doi:10.3390/life11030246), 2021-03-16
Supplement: s1 [file s1]

## Supplementary Material

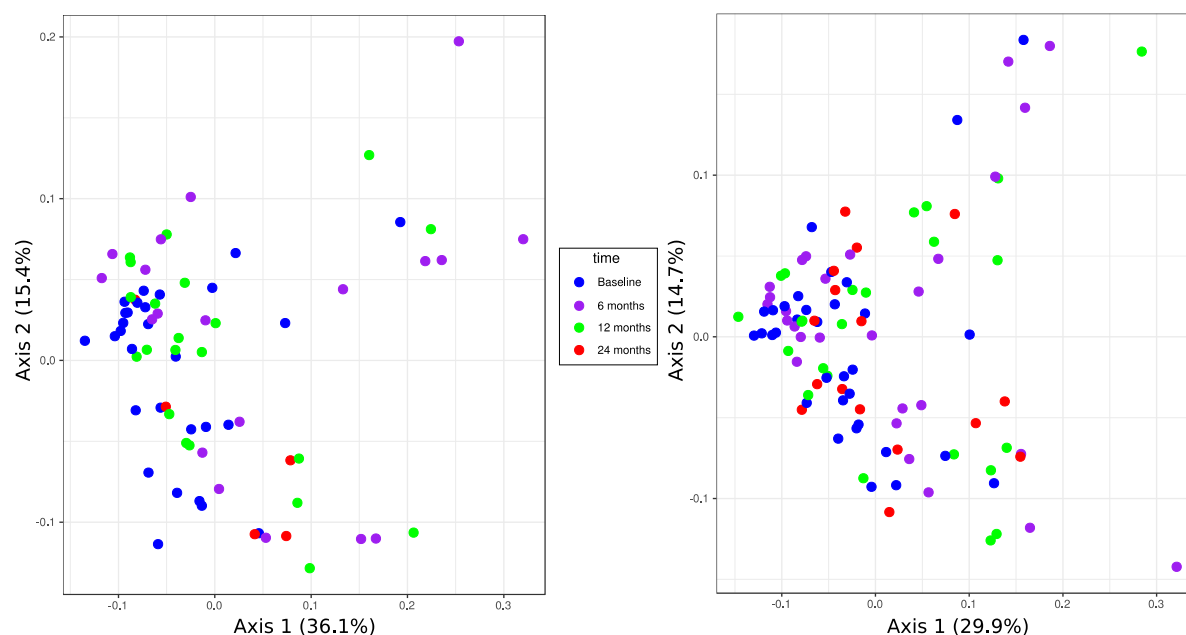

**Figure S1.** Microbial composition visualised by principal coordinate analysis (PCoA). PCoA on the left side presents the data of patients within the group with complications and on the right side the data of the non-complication group. Different colours correspond to the distinct timepoints: blue represents baseline, purple represents 6 months, green represents 12 months and red represents 24 months. Postoperative complications also affect the structure of the microbiome 6 months after surgery in patients with complications ( $R^2=0.09$ ,  $p$ -value =0.006). In the non-complication group, no structural differences were detected.

**Table S1.** Differentially abundant RSV at baseline between patient with complication and patient without complication. Test was performed using Deseq 2 and a positive log2 (Fold change) indicates an enrichment in the group with complications.

| RSV    | LOG2 FOLDCHANGE | PADJ       | TAXONOMY                                                                                           |
|--------|-----------------|------------|----------------------------------------------------------------------------------------------------|
| RSV4   | 24,3388578      | 1,4933E-14 | Verrucomicrobia;Verrucomicrobiae;Verrucomicrobiales; Akkermansiaceae;Akkermansia;muciniphila       |
| RSV7   | -10,386         | 0,00173794 | Firmicutes;Negativicutes;Selenomonadales; Acidaminococcaceae;Phascolarctobacterium;faecium         |
| RSV122 | 25,0570292      | 3,5616E-15 | Bacteroidetes;Bacteroidia;Bacteroidales; Muribaculaceae;unclassified                               |
| RSV177 | 24,9228975      | 3,5616E-15 | Firmicutes;Clostridia;Clostridiales;Ruminococcaceae; Ruminococcaceae_UCG-014;unclassified          |
| RSV247 | -23,524721      | 2,6589E-17 | Proteobacteria;Gammaproteobacteria;Betaproteobacteriales; Burkholderiaceae;Sutterella;unclassified |
| RSV283 | 23,6306827      | 7,6214E-14 | Bacteroidetes;Bacteroidia;Bacteroidales;Prevotellaceae; Prevotella_9;unclassified                  |
| RSV356 | 23,255365       | 1,862E-13  | Bacteroidetes;Bacteroidia;Bacteroidales; Muribaculaceae;unclassified                               |
| RSV366 | 23,1530754      | 2,186E-13  | Bacteroidetes;Bacteroidia;Bacteroidales; Marinifilaceae;Butyricimonas;unclassified                 |
| RSV424 | -23,983283      | 3,5947E-14 | Firmicutes;Clostridia;Clostridiales; Ruminococcaceae;unclassified                                  |

**Table S2.** Food group factor loadings for the “western”, “fruit & vegetable” and “bread & butter” dietary pattern, identified using PCA.

| Food groups                   | Western        | Bread and Butter | Fruit and Vegetable |
|-------------------------------|----------------|------------------|---------------------|
| Potatoes                      | 0.34182        | 0.09982          | 0.08548             |
| Vegetables                    | 0.02552        | 0.06753          | <b>0.77370</b>      |
| Legumes                       | 0.24123        | −0.02070         | 0.15801             |
| Fruits                        | −0.09217       | 0.04007          | <b>0.44247</b>      |
| Dairy Products                | 0.15488        | 0.02846          | 0.04978             |
| Pasta, Rice, and Other gGrain | 0.24562        | 0.04302          | −0.07426            |
| Bread                         | 0.07248        | <b>0.86524</b>   | −0.01947            |
| Grains                        | 0.16318        | 0.00263          | −0.05091            |
| Red meat                      | <b>0.56690</b> | 0.10920          | 0.09055             |
| Poultry                       | <b>0.42827</b> | −0.01106         | 0.06643             |
| Processed Meat                | <b>0.63896</b> | 0.16371          | −0.03092            |
| Fish and Shellfish            | 0.16942        | 0.11707          | 0.16117             |
| Eggs and Egg Products         | 0.24525        | 0.08454          | 0.05436             |
| Vegetable Oil                 | 0.14557        | −0.06443         | <b>0.57565</b>      |
| Butter                        | 0.01076        | <b>0.76734</b>   | 0.04804             |
| Margarine                     | 0.16780        | 0.27529          | 0.06402             |
| Frying Fat                    | 0.08789        | 0.17593          | 0.27700             |
| Sweets                        | 0.24228        | 0.17268          | 0.01400             |
| Cakes                         | 0.26255        | 0.04549          | 0.03868             |
| Non-Alcohol                   | 0.04391        | 0.02291          | 0.19266             |
| Wine                          | 0.03815        | 0.04914          | −0.03866            |
| Other Alcohol                 | 0.12445        | 0.03436          | −0.06308            |
| Sauce and Condiments          | 0.28162        | −0.02826         | 0.11408             |
| Soups                         | 0.19334        | 0.01960          | 0.11951             |
| Soy                           | 0.01516        | −0.04436         | 0.17510             |

Factor loadings greater than |0.40| are shown in bold

PCA=Principal component analysis
